# Supplementary material for: Phytochrome B photobodies are comprised of phytochrome B and its primary and secondary interacting proteins
Source: PubMed Central journal article supplement (PMC10042835; doi:10.1038/s41467-023-37421-z), 2023-03-27
Supplement: 41467_2023_37421_MOESM2_ESM.pdf [file 41467_2023_37421_MOESM2_ESM.pdf]

### **Description of Additional Supplementary Files**

**Supplementary Data 1** LC-MS/MS analysis of isolated photobody samples.

**Supplementary Data 2** The fraction of protoplasts showing the photobody localization of a protein of interest in the presence or the absence of a co-expressed protein

**Supplementary Data 3** Primers used in this study
